# Supplementary material
Source: Springer Nature journal article supplement (https://www.springermedizin.de/resource/supplementary/13012_2013_844_MOESM3_ESM.pdf/9630578)
Supplement: MOESM3 [file 9630578]

**Additional file 3: Included handbooks [ordered by organisation]**

| <b>Number</b> | <b>Organisation</b>                                                       | <b>Country</b>           | <b>Title handbook</b>                                                                                                                                                              | <b>Year</b>  |
|---------------|---------------------------------------------------------------------------|--------------------------|------------------------------------------------------------------------------------------------------------------------------------------------------------------------------------|--------------|
| 1             | U.S. Preventive Services Task Force <sup>43</sup>                         | United States of America | U.S. Preventive Services Task Force Procedure Manual.                                                                                                                              | 2008         |
| 2             | American Academy of Otolaryngology–Head and Neck Surgery <sup>38</sup>    | United States of America | Clinical Practice Guideline Development Manual, Third Edition: a quality-driven approach for translating evidence into action.                                                     | 2013         |
| 3             | American College of Chest Physicians <sup>51</sup>                        | United States of America | Evidence-based Guideline Development Process                                                                                                                                       | Not reported |
| 4             | American College of Occupational and Environmental Medicine <sup>39</sup> | United States of America | Methodology to Update the Practice Recommendations in the American College of Occupational and Environmental Medicine’s Occupational Medicine Practice Guidelines, Second Edition. | 2008         |
| 5             | American College of Physicians <sup>40</sup>                              | United States of America | The development of clinical practice guidelines and guidance statements of the American College of Physicians: summary of methods.                                                 | 2010         |
| 6             | American Heart Association <sup>44</sup>                                  | United States of America | Methodology Manual and Policies From the ACCF/AHA Task Force on Practice Guidelines.                                                                                               | 2010         |
| 7             | American Society of Clinical Oncology <sup>37</sup>                       | United States of America | American Society of Clinical Oncology Guideline Procedures Manual.                                                                                                                 | 2011         |
| 8             | American Urological Association <sup>41</sup>                             | United States of         | Overview: Standard Operating Procedures.                                                                                                                                           | 2011         |

|    |                                                                               |                    |                                                                                                 |      |
|----|-------------------------------------------------------------------------------|--------------------|-------------------------------------------------------------------------------------------------|------|
|    |                                                                               | America            |                                                                                                 |      |
| 9  | Bundesärztekammer <sup>28</sup>                                               | Germany            | National Disease Management Guidelines.                                                         | 2002 |
| 10 | Arzneimittelkommission der deutschen Ärzteschaft <sup>27</sup>                | Germany            | Leitfaden für die Erstellung von Therapieempfehlungen.                                          | 2011 |
| 11 | Canadian Medical Association <sup>46</sup>                                    | Canada             | Handbook on Clinical Practice Guidelines.                                                       | 2007 |
| 12 | Canadian Thoracic Society <sup>50</sup>                                       | Canada             | Canadian Thoracic Society: Presenting a new process for clinical practice guideline production. | 2009 |
| 13 | Agència d'Avaluació de Tecnologia i Recerca Mèdiques. <sup>25</sup>           | Spain              | Guies de pràctica clínica.                                                                      | 2002 |
| 14 | Domus Medical Flemish College of General Practitioners <sup>34</sup>          | Belgium - Flanders | Algemeen Stramien voor de Ontwikkeling van Aanbevelingen van Goede Medische Praktijkvoering.    | 2007 |
| 15 | Drug Commission of the German Medical Association <sup>26</sup>               | Germany            | Handbuch zur Entwicklung regionaler Leitlinien.                                                 | 2006 |
| 16 | Duodecim Finnish Medical Society <sup>33</sup>                                | Finland            | Submitted NHS Evidence Accreditation Application.                                               | 2010 |
| 17 | Duodecim Medical Publications <sup>32</sup>                                   | Finland            | Preface: What is Evidence-Based Medicine Guidelines.                                            | 2008 |
| 18 | Kwaliteitsinstituut voor de Gezondheidszorg CBO <sup>23</sup>                 | The Netherlands    | Evidence-based Richtlijnontwikkeling Handleiding voor werkgroepleden.                           | 2007 |
| 19 | European Region Of The World Confederation For Physical Therapy <sup>24</sup> | Europe             | Framework for Clinical Guideline Development in Physiotherapy.                                  | 2004 |
| 20 | European Society of Gastrointestinal Endoscopy <sup>29</sup>                  | Europe             | European Society of Gastrointestinal Endoscopy (ESGE) Guideline Development                     | 2012 |

|    |                                                                    |                           |                                                                                                        |              |
|----|--------------------------------------------------------------------|---------------------------|--------------------------------------------------------------------------------------------------------|--------------|
|    |                                                                    |                           | Policy.                                                                                                |              |
| 21 | Ärztliche Zentralstelle Qualitätssicherung <sup>31</sup>           | Germany                   | National Disease Management Guidelines: Method Report.                                                 | 2002         |
| 22 | Centrul Național de Studii Medicina Familiei <sup>22</sup>         | Romania                   | Metodologie elaborarii ghidului de practica.                                                           | Not reported |
| 23 | Working Group on CPG Updates <sup>5</sup>                          | Spain                     | Updating Clinical Practice Guidelines in the Spanish National Health System: Methodology Handbook.     | 2009         |
| 24 | Guidelines and Protocols Advisory Committee <sup>42</sup>          | Canada                    | GPAC Handbook                                                                                          | 2011         |
| 25 | Haute Autorité de Santé <sup>21</sup>                              | France                    | Élaboration de recommandations de bonne pratique.                                                      | 2010         |
| 26 | Italian Society for Haemostasis and Thrombosis <sup>30</sup>       | Italy                     | Objectives and methodology: Guidelines of the Italian Society for Haemostasis and Thrombosis (SISSET). | 2009         |
| 27 | Joanna Briggs Institute Synthesis Science Unit <sup>45</sup>       | International             | Best Practice Information Sheet (BPIS) Procedures.                                                     | Not reported |
| 28 | National Health and Medical Research Council <sup>36</sup>         | Australia                 | A guide to the development, implementation and evaluation of clinical practice guidelines.             | 1998         |
| 26 | National Institute for Health and Clinical Excellence <sup>6</sup> | United Kingdom            | The guidelines manual.                                                                                 | 2012         |
| 30 | New Zealand Guidelines Group <sup>49</sup>                         | New Zealand               | Handbook for the Preparation of Explicit Evidence-base Clinical Practice Guidelines.                   | 2001         |
| 31 | Scottish Intercollegiate Guidelines Network <sup>14</sup>          | United Kingdom – Scotland | SIGN 50: A guideline developer's handbook.                                                             | 2011         |

|    |                                                              |                          |                                                                                                              |      |
|----|--------------------------------------------------------------|--------------------------|--------------------------------------------------------------------------------------------------------------|------|
| 32 | Society for Vascular Surgery <sup>52</sup>                   | United States of America | Guideline methodology of the Society for Vascular Surgery including the experience with the GRADE framework. | 2011 |
| 33 | Caring for Australasians with Renal Impairment <sup>48</sup> | Australia                | A Guide for Writers.                                                                                         | 2009 |
| 34 | Therapeutic Guidelines Limited <sup>47</sup>                 | Australia                | How Therapeutic Guidelines are produced.                                                                     | 2011 |
| 35 | World Health Organization <sup>35</sup>                      | International            | Guidelines for WHO guidelines.                                                                               | 2003 |
